# Supplementary material for: On the differences in the vertical distribution of modeled aerosol optical depth over the southeast Atlantic
Source: Copernicus journal article supplement (doi:10.5194/acp-2022-496), 2022-09-02
Supplement: Supplementary file 1 [file acp-2022-496-supplement.pdf]

Supplement of

# **On the differences in the vertical apportionment of modeled aerosol optical depth over the southeast Atlantic**

Ian Chang et al.

Correspondence: Ian Chang ([ian.chang@ou.edu](mailto:ian.chang@ou.edu)) and Lan Gao ([lgao@ou.edu](mailto:lgao@ou.edu))

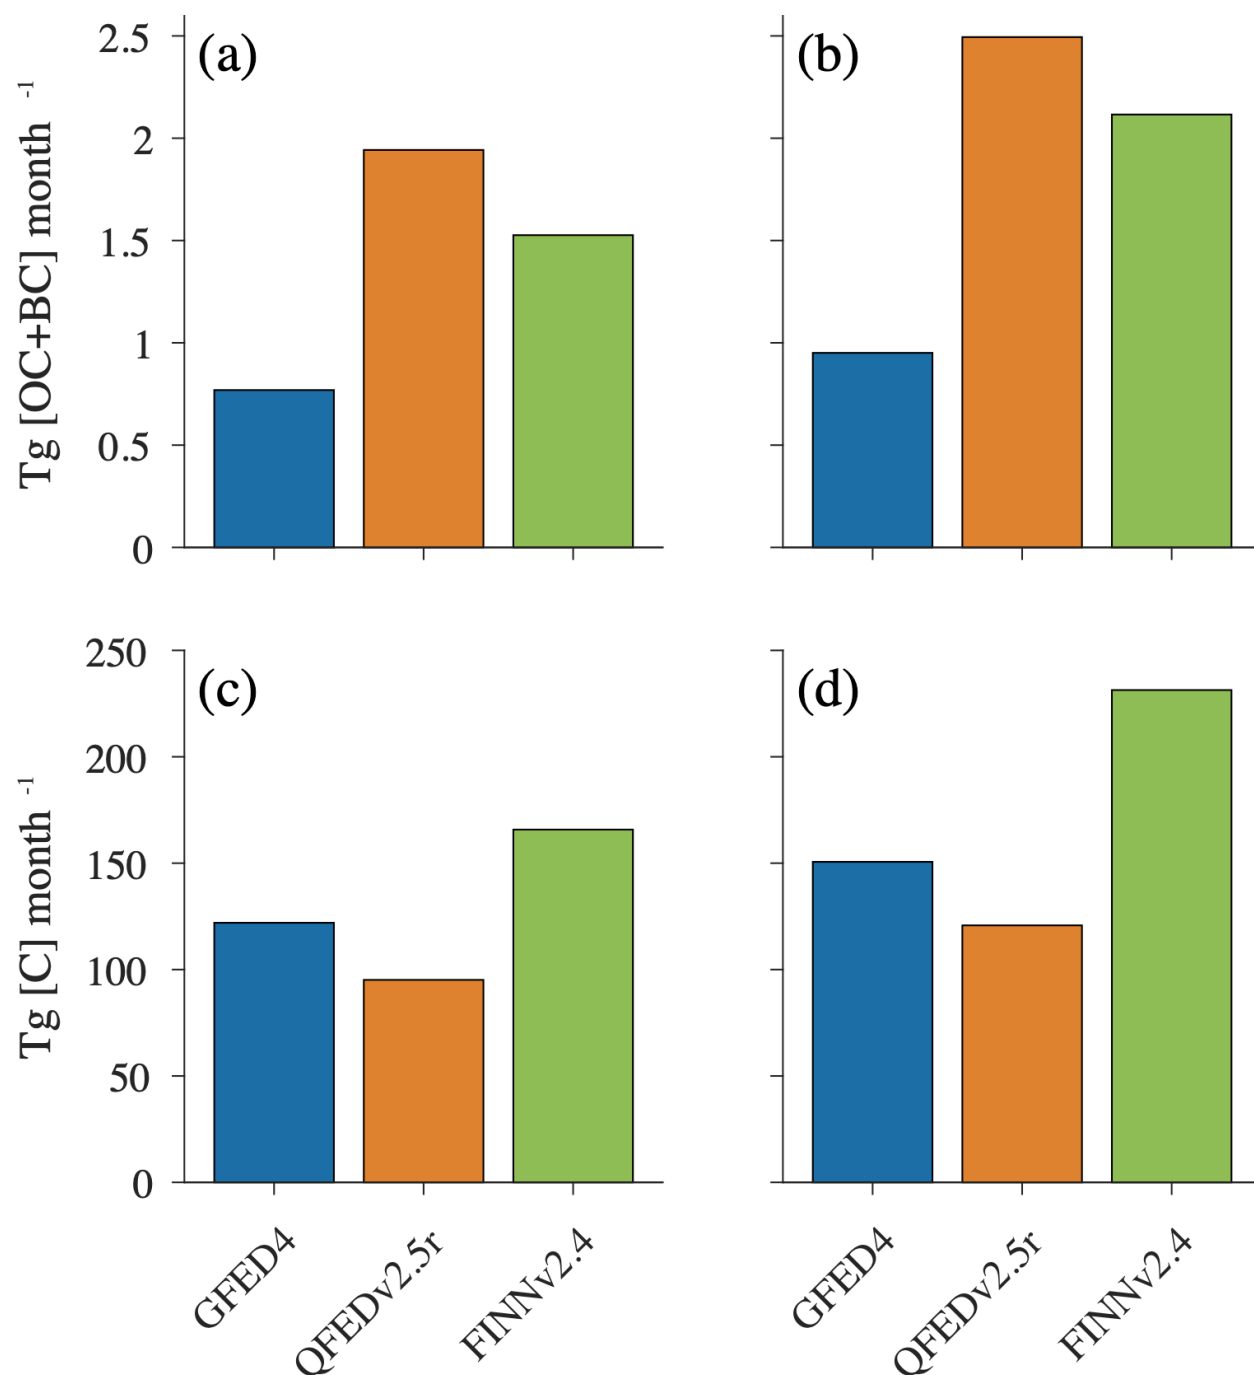

Figure S 1. Comparison of biomass burning emissions (Tg month<sup>-1</sup>) from GFED4, QFEDv2.5r1 and FINNV2.4 within the region 19° W-53° E, 36° S-22° N during (left) September 2016 and (right) August 2017. (top) Organic and black carbon (OC+BC) and (bottom) total carbon (C) emissions. Total carbon emissions were calculated by taking the carbon parts of CO, CO<sub>2</sub>, CH<sub>4</sub>, OC and BC.

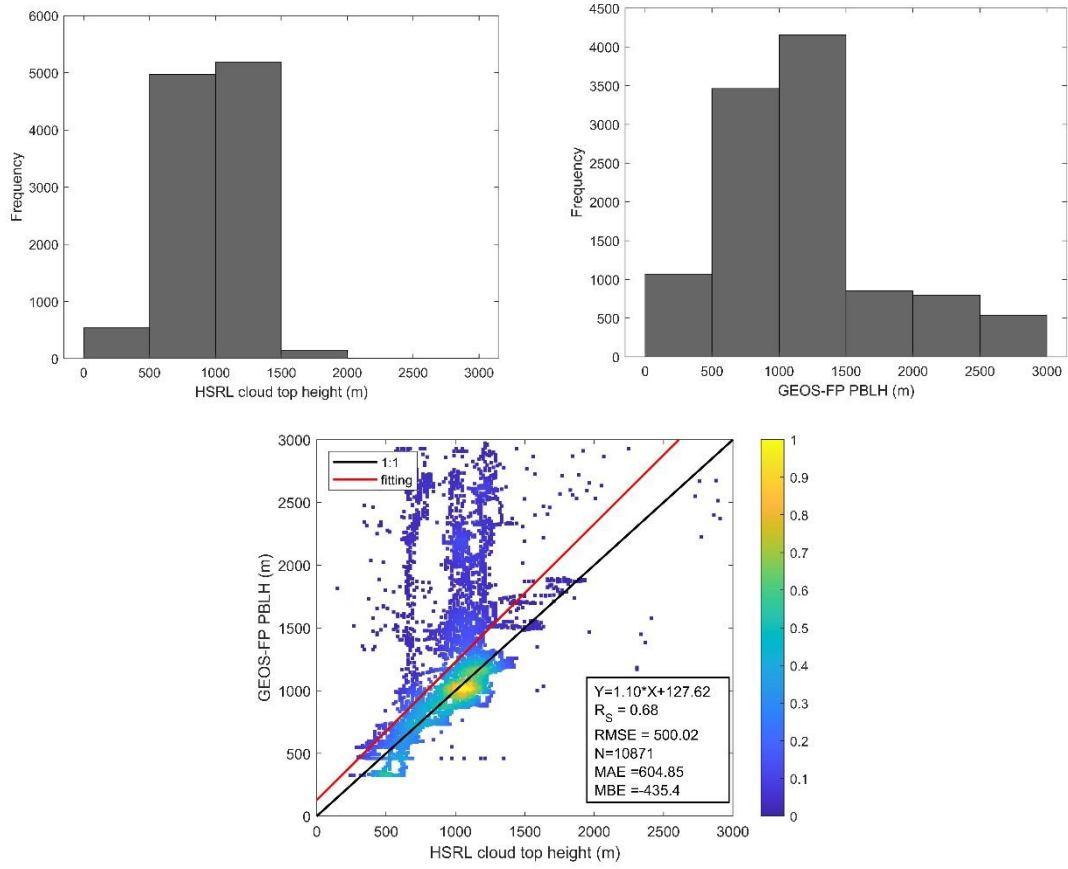

Figure S 2. Histograms and normalized density-gradient scatterplots comparing GEOS-FP PBL height against HSRL-2's cloud-top height during September 2016 of NASA ORACLES.

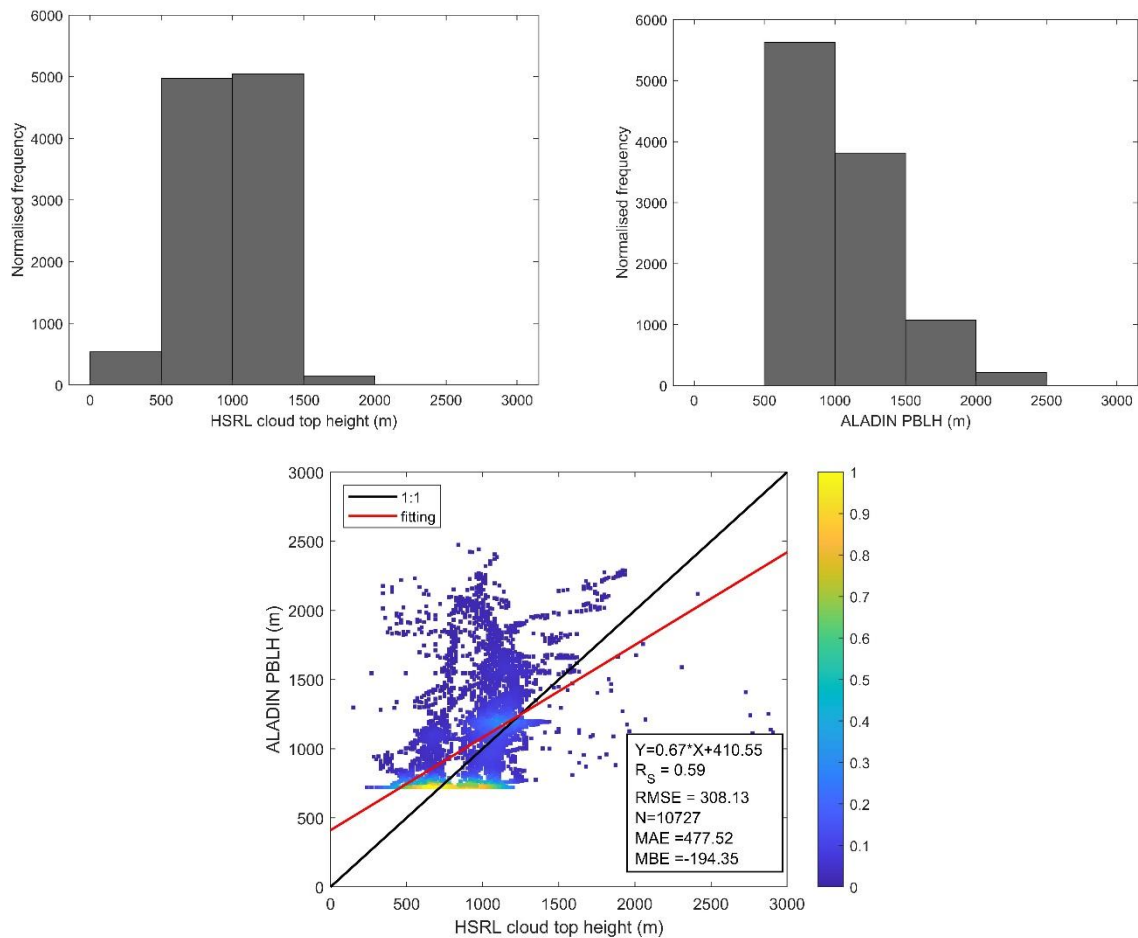

Figure S 3. As in Figure S 2, but for ALADIN PBL height.

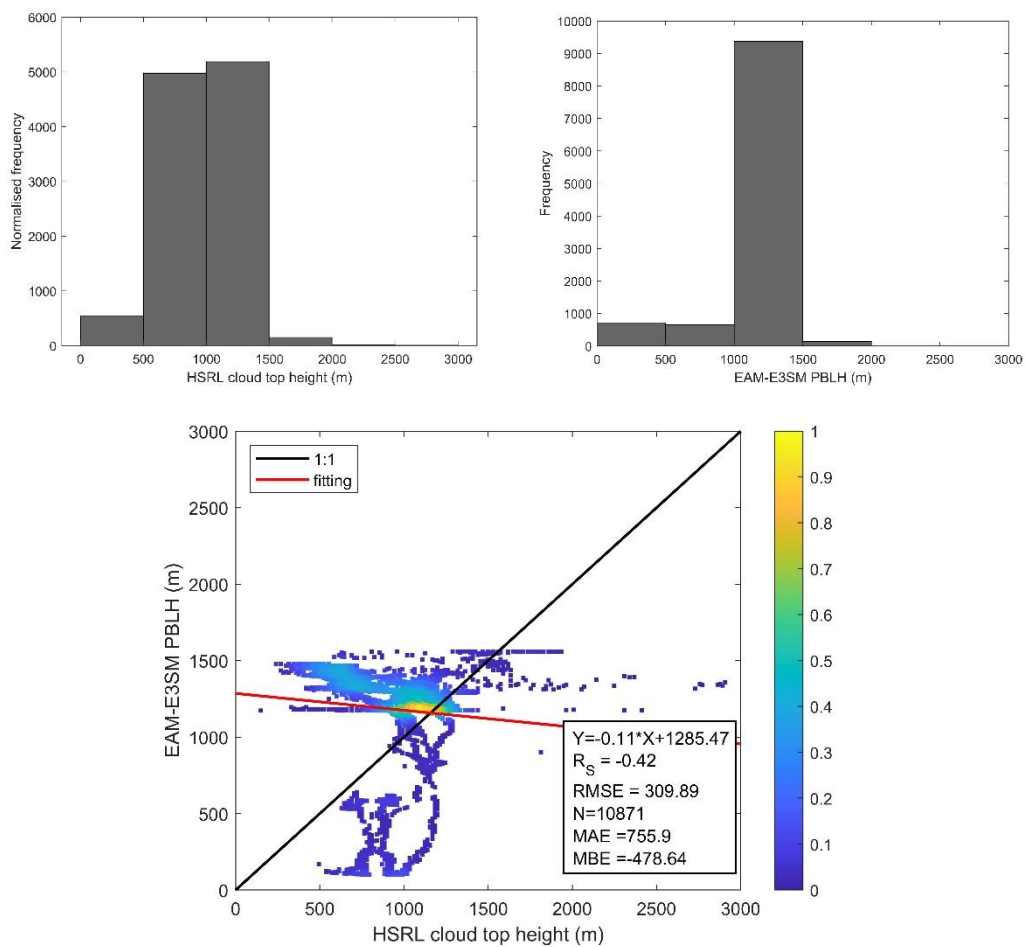

Figure S 4. As in Figure S 2, but for EAM-E3SM PBL height.

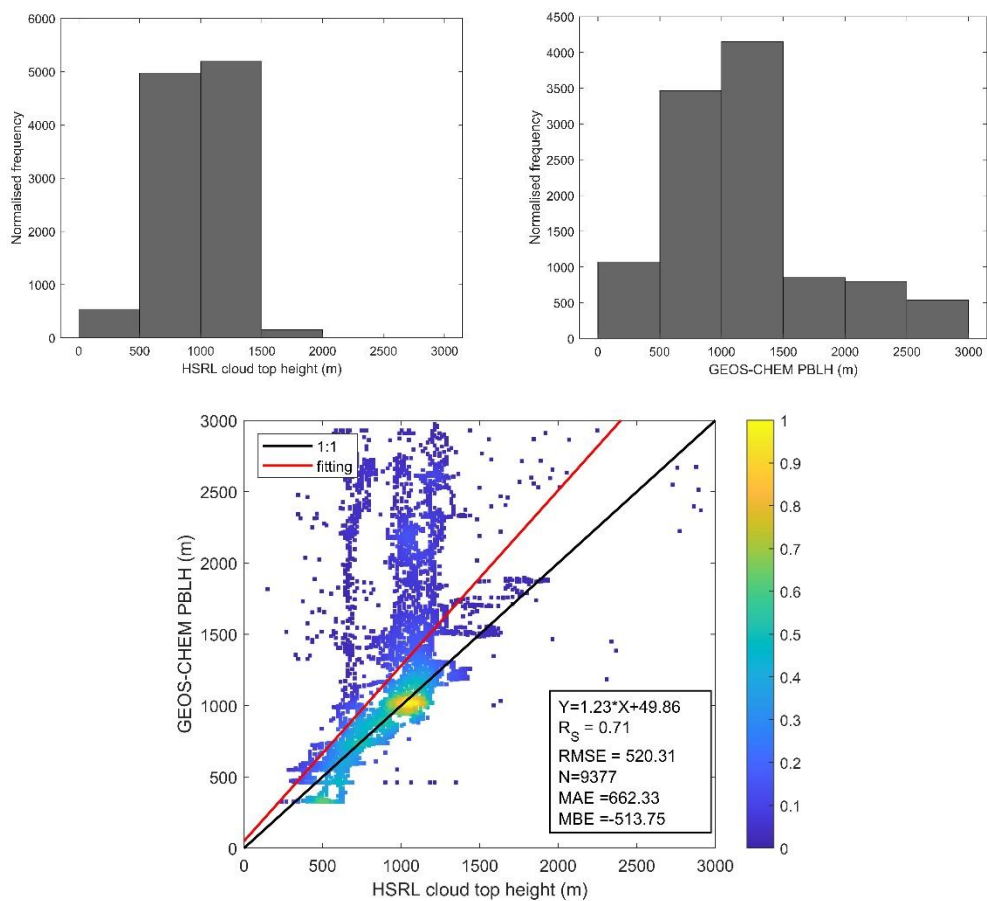

Figure S 5. As in Figure S 2, but for GEOS-CHEM PBL height.

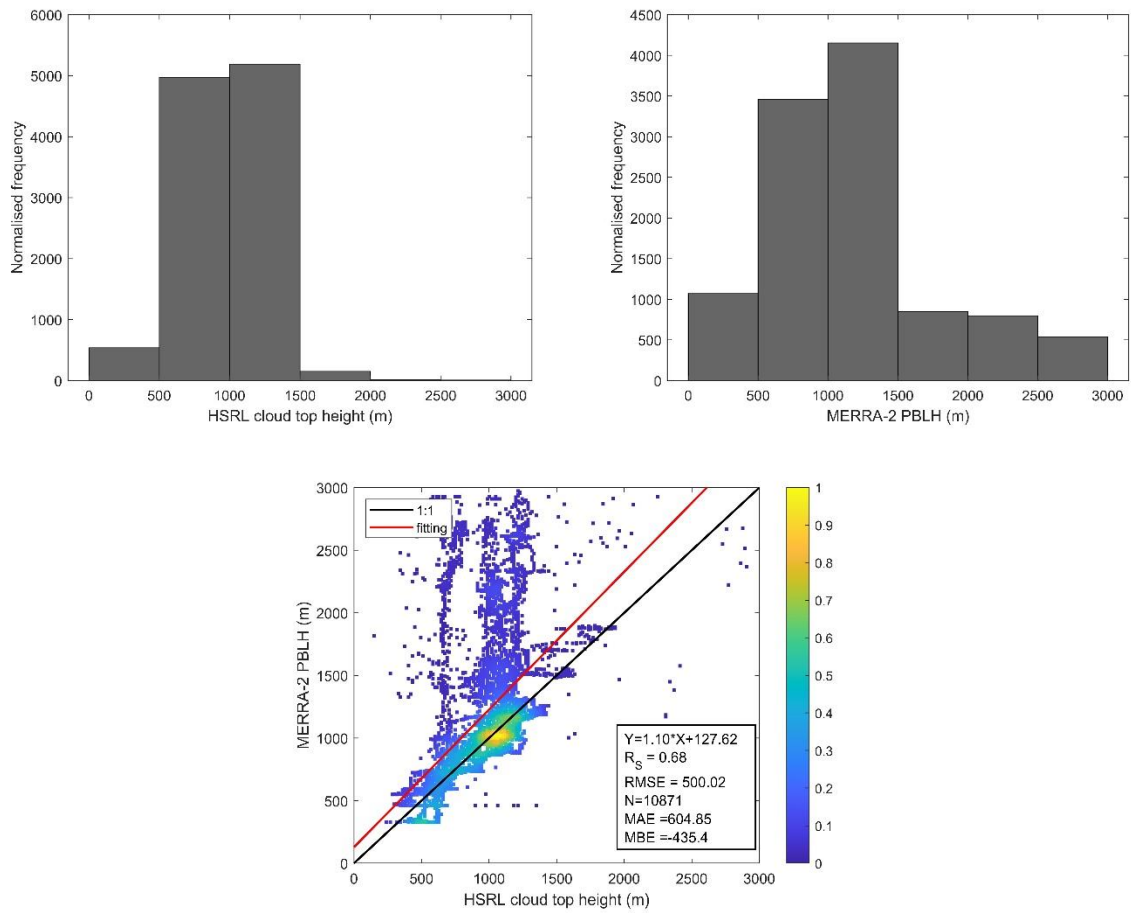

Figure S 6. As in Figure S 2, but for MERRA-2 PBL height.

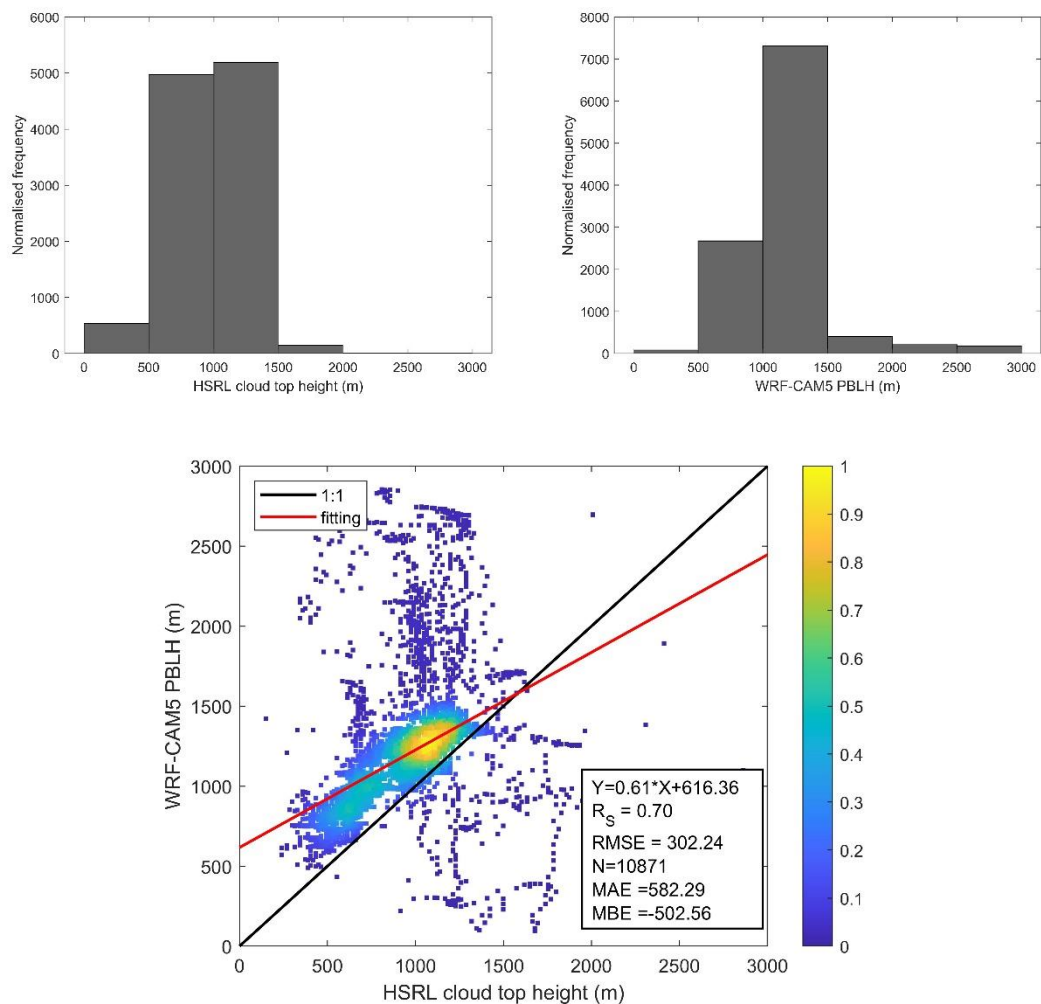

Figure S 7. As in Figure S 2, but for WRF-CAM5 PBL height.



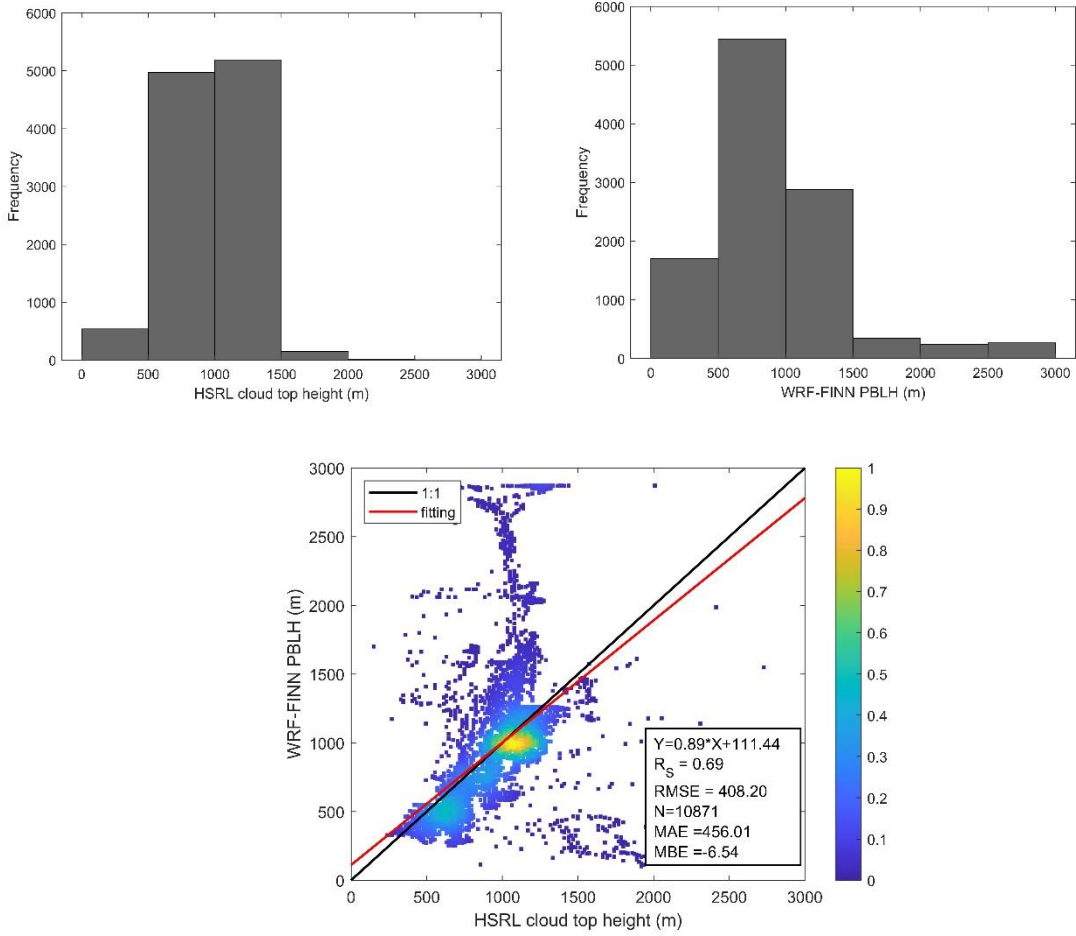

Figure S 8. As in Figure S 2, but for WRF-FINN PBL height.

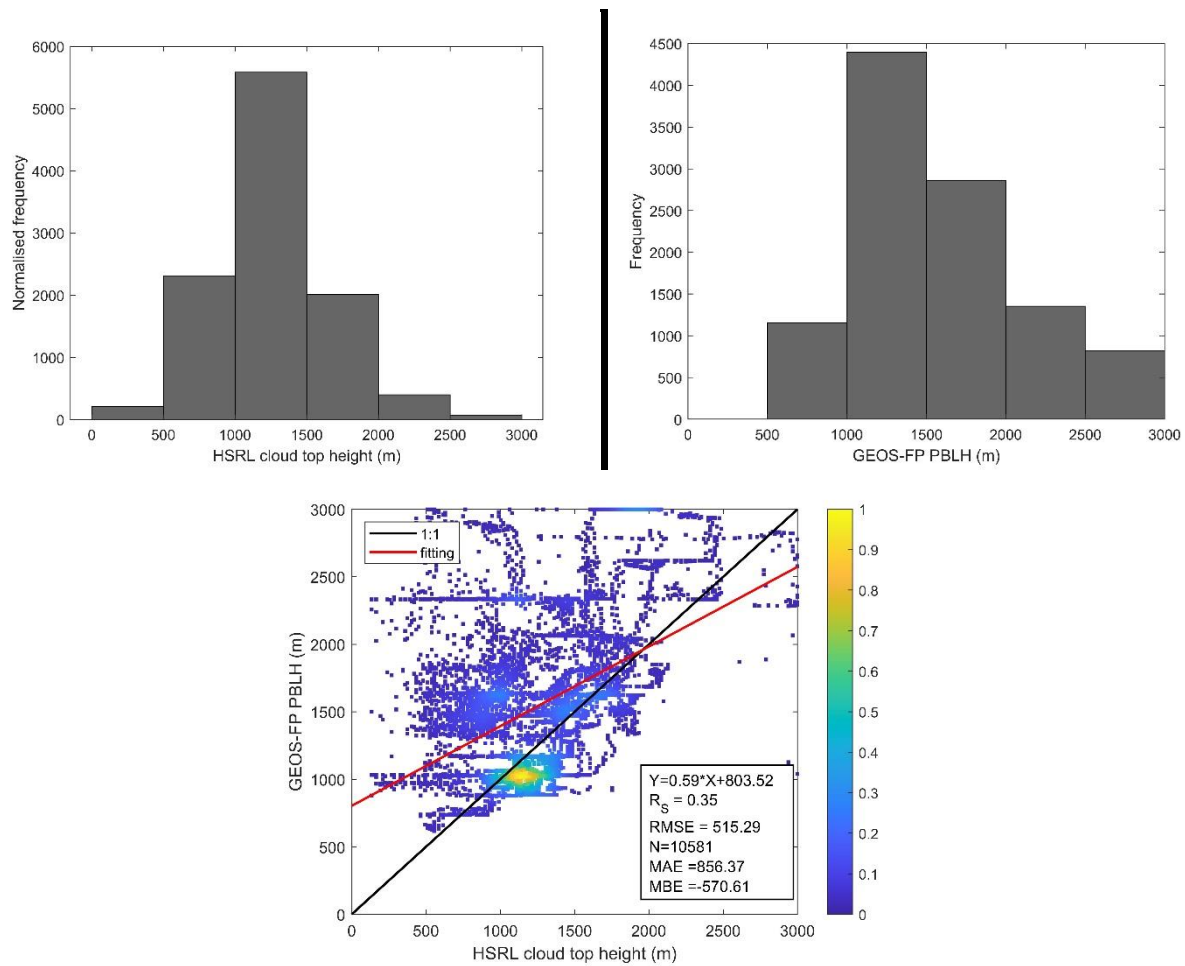

Figure S 9. As in Figure S 2, but for GEOS-FP in August 2017.

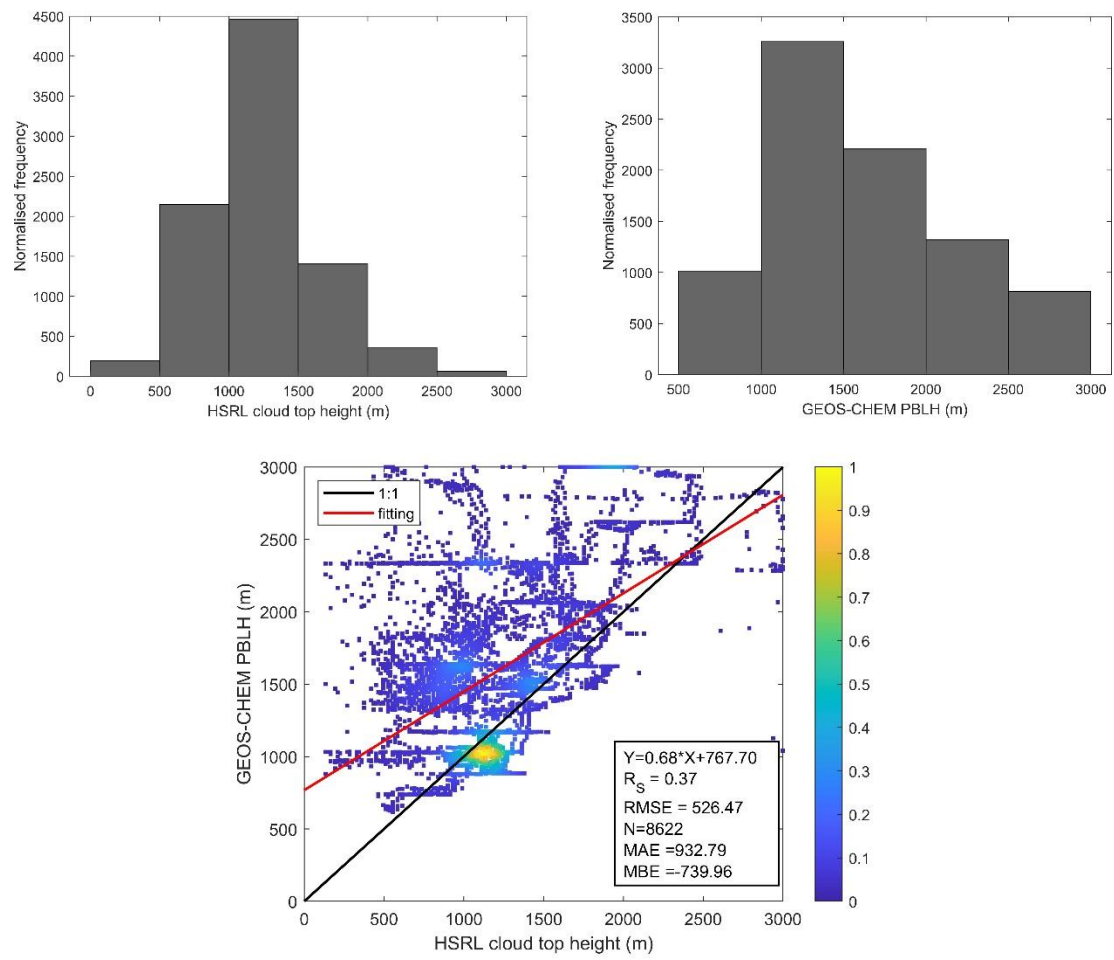

Figure S 10. As in Figure S 2, but for GEOS-Chem in August 2017.

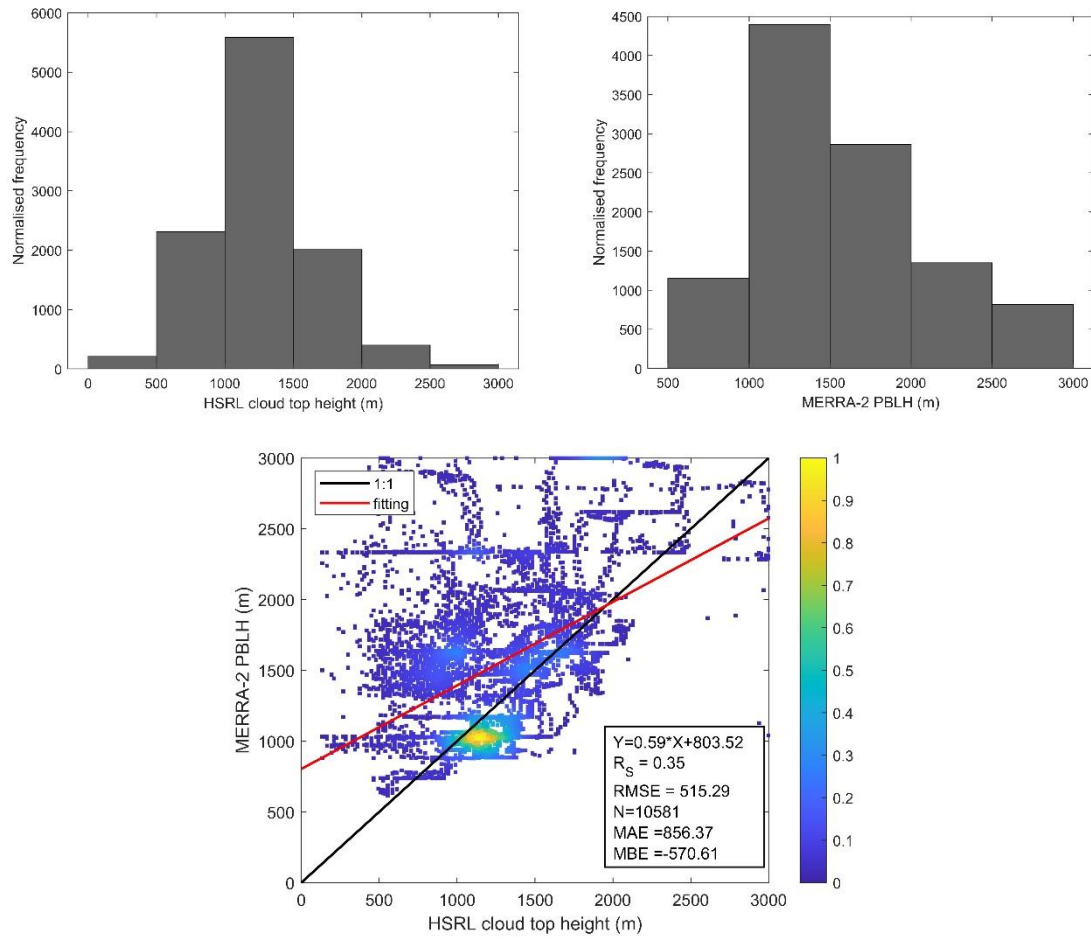

Figure S 11. As in Figure S 2, but for MERRA-2 in August 2017.

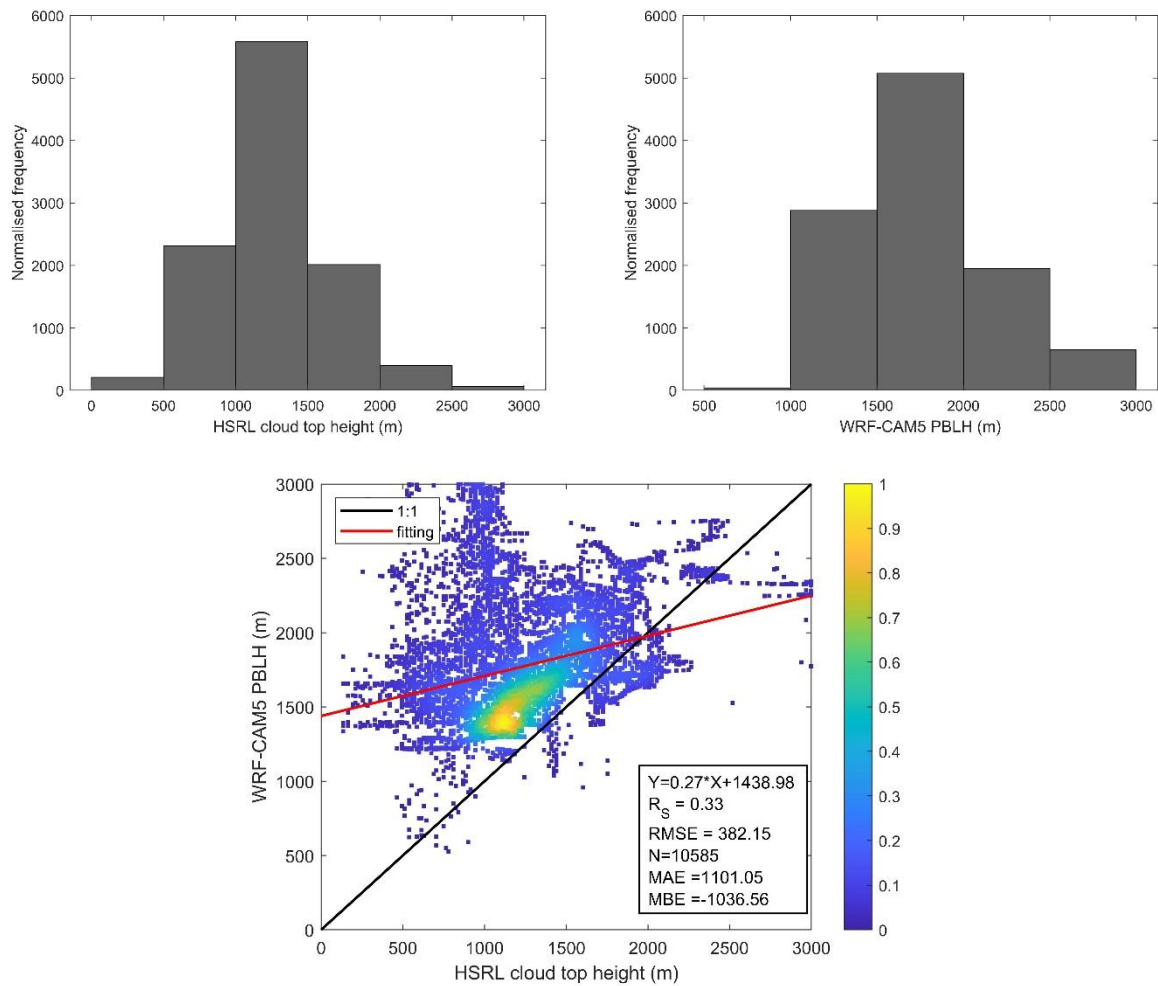

Figure S 12. As in Figure S 2, but for WRF-CAM5 in August 2017.

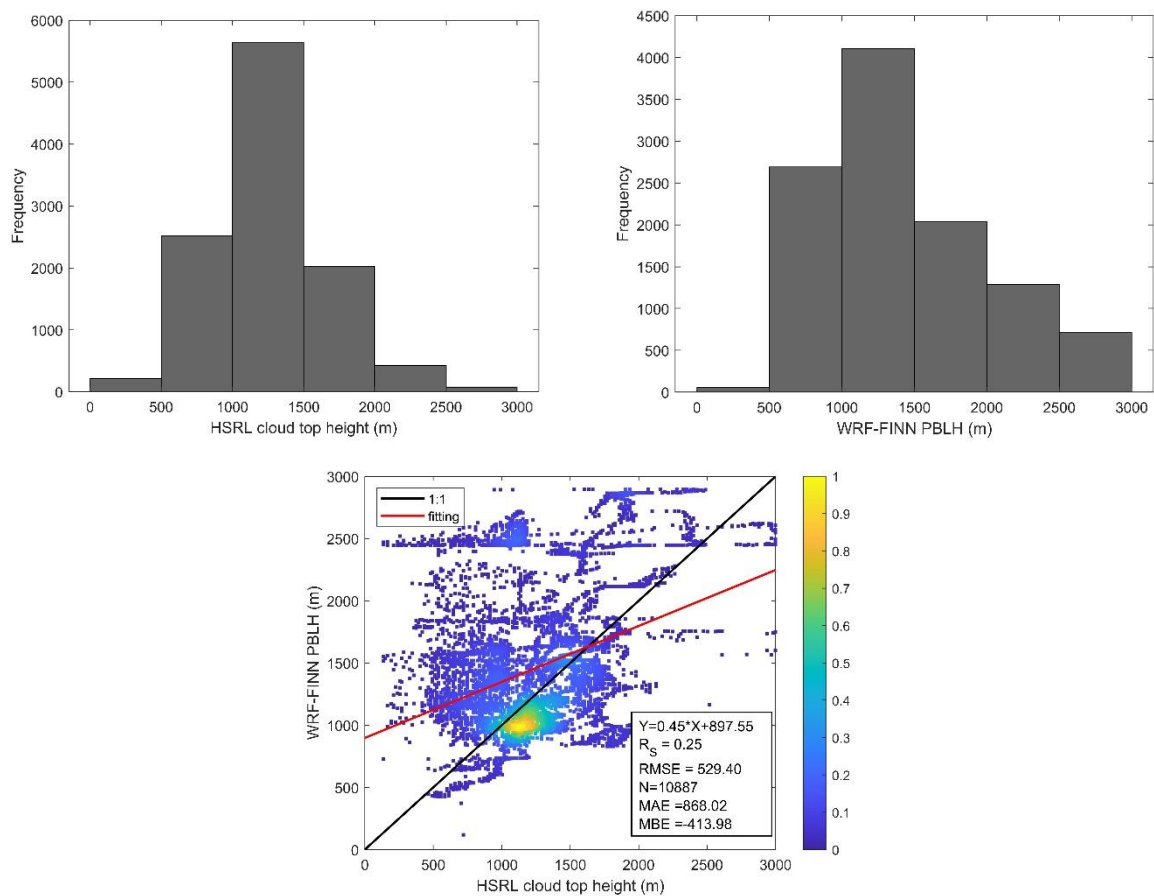

Figure S 13. As in Figure S 2, but for WRF-FINN in August 2017.

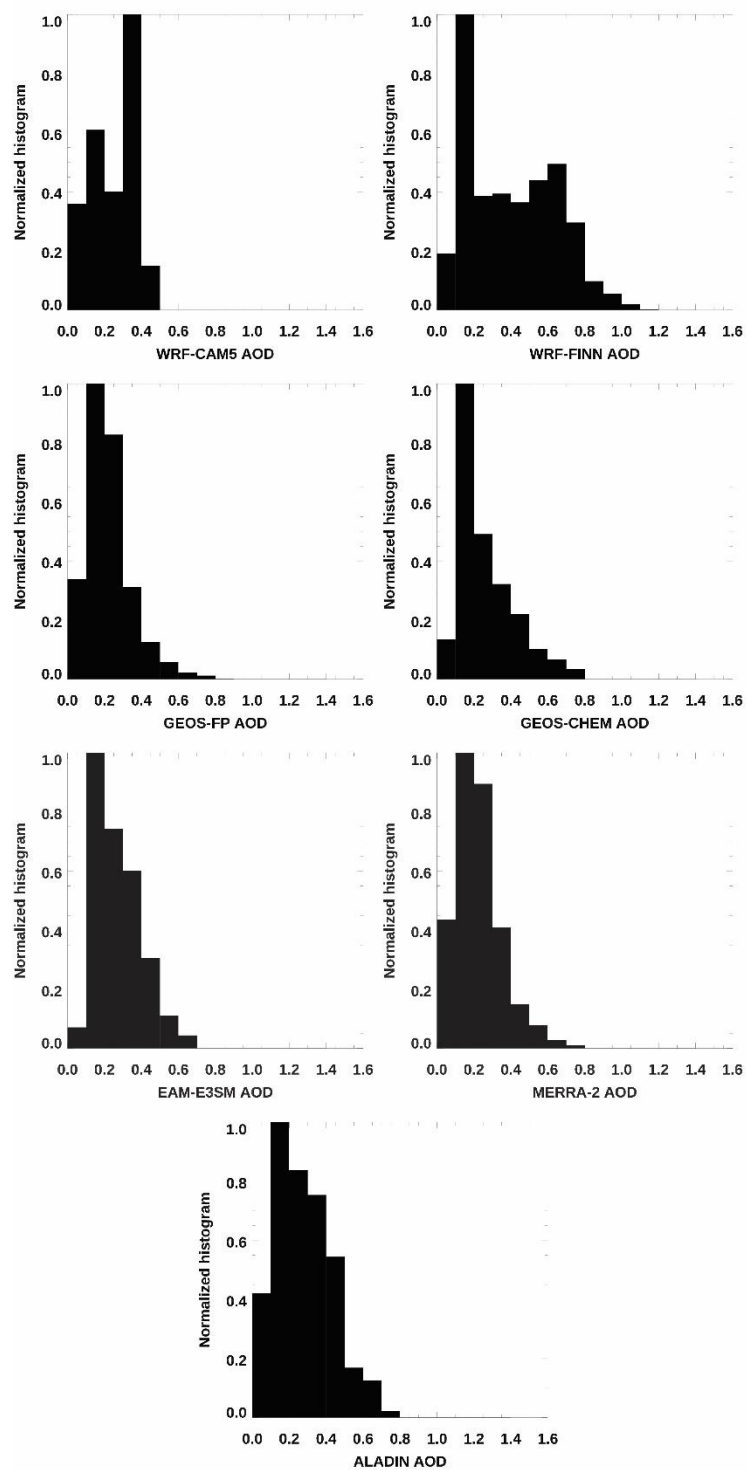

Figure S 14. Histograms of the modeled AOD in Figure 6.

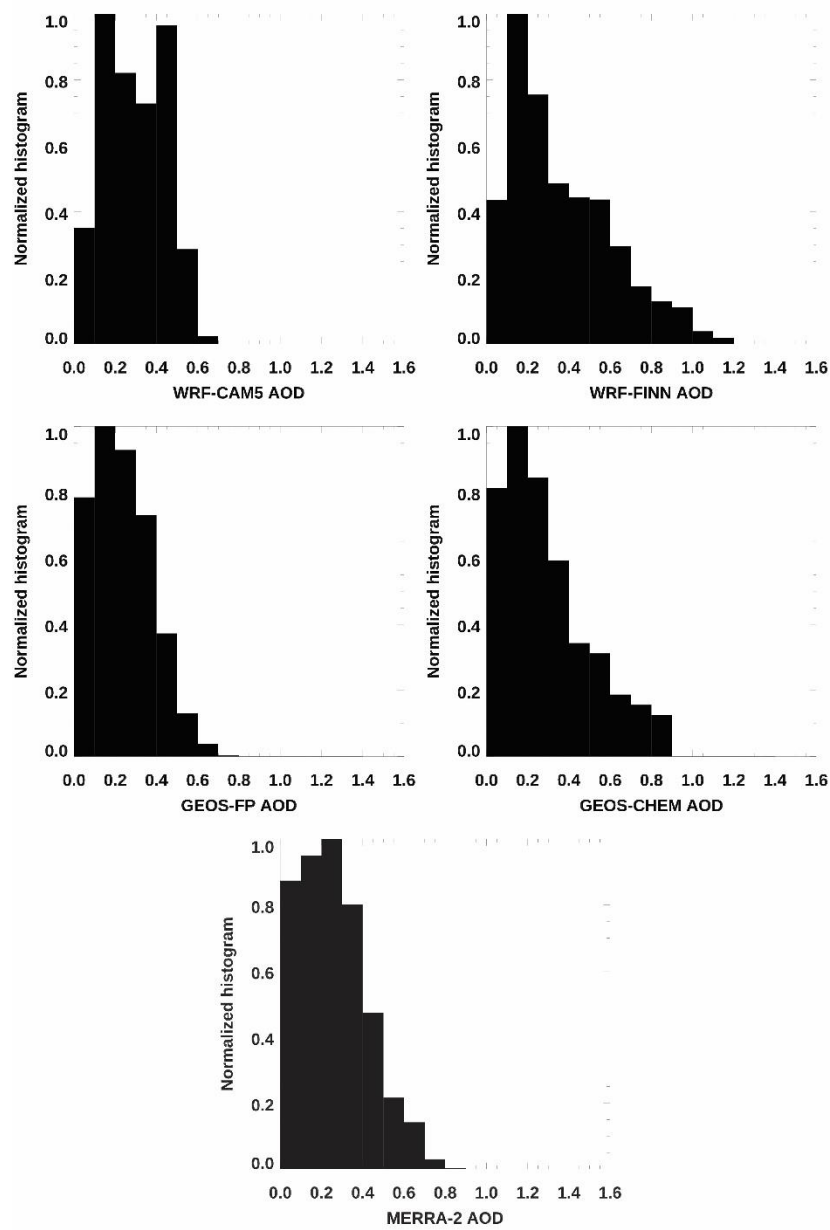

Figure S 15. Histograms of the modeled AOD in Figure 7.



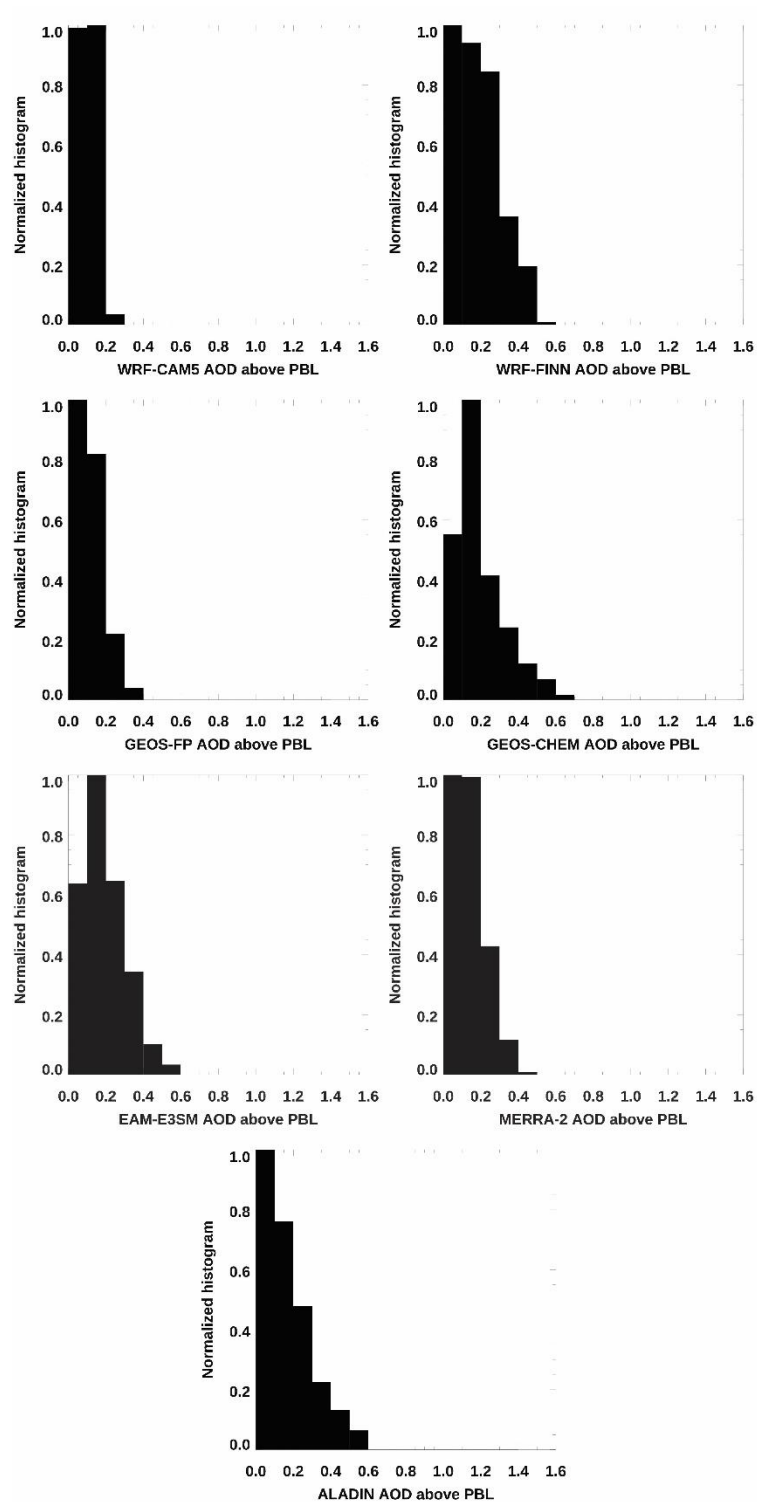

Figure S 16. Histograms of the modeled AOD above PBL (i.e., FT) in Figure 8.

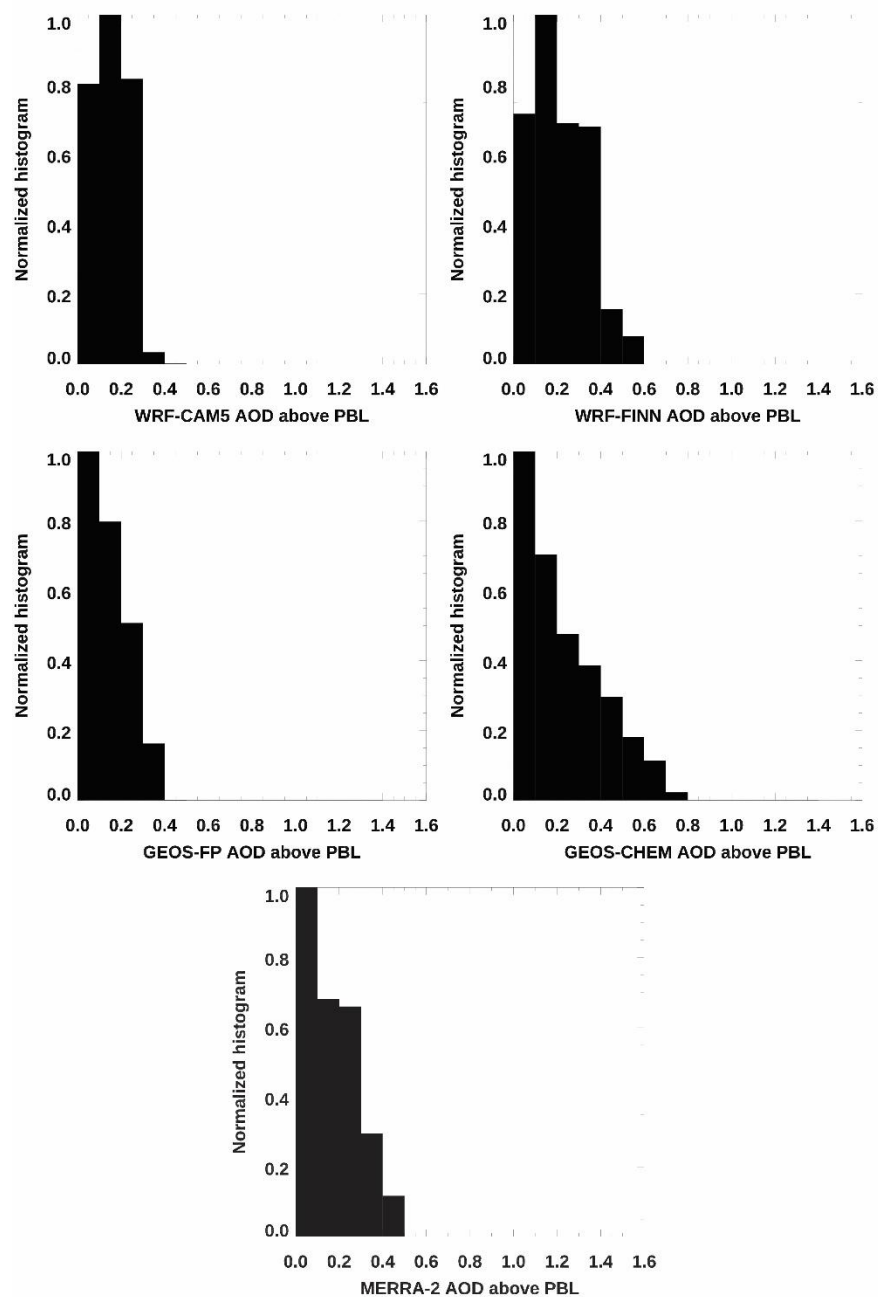

Figure S 17. Histograms of the modeled AOD above PBL (i.e., FT) in Figure 9.

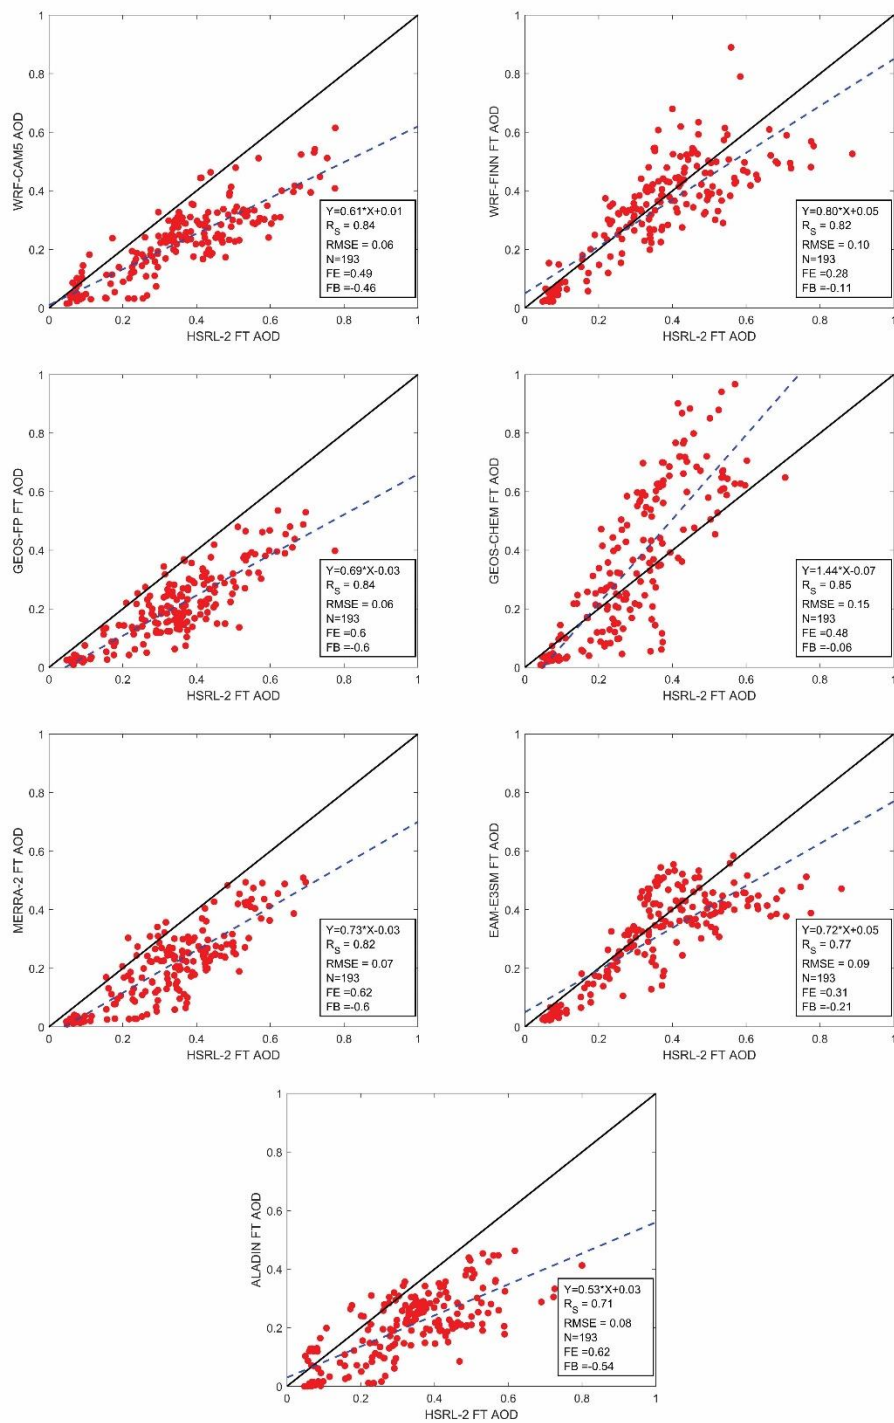

Figure S 18. Scatter plots comparing FT AOD among models and the HSRL-2 during September 2016 of the ORACLES field experiment.

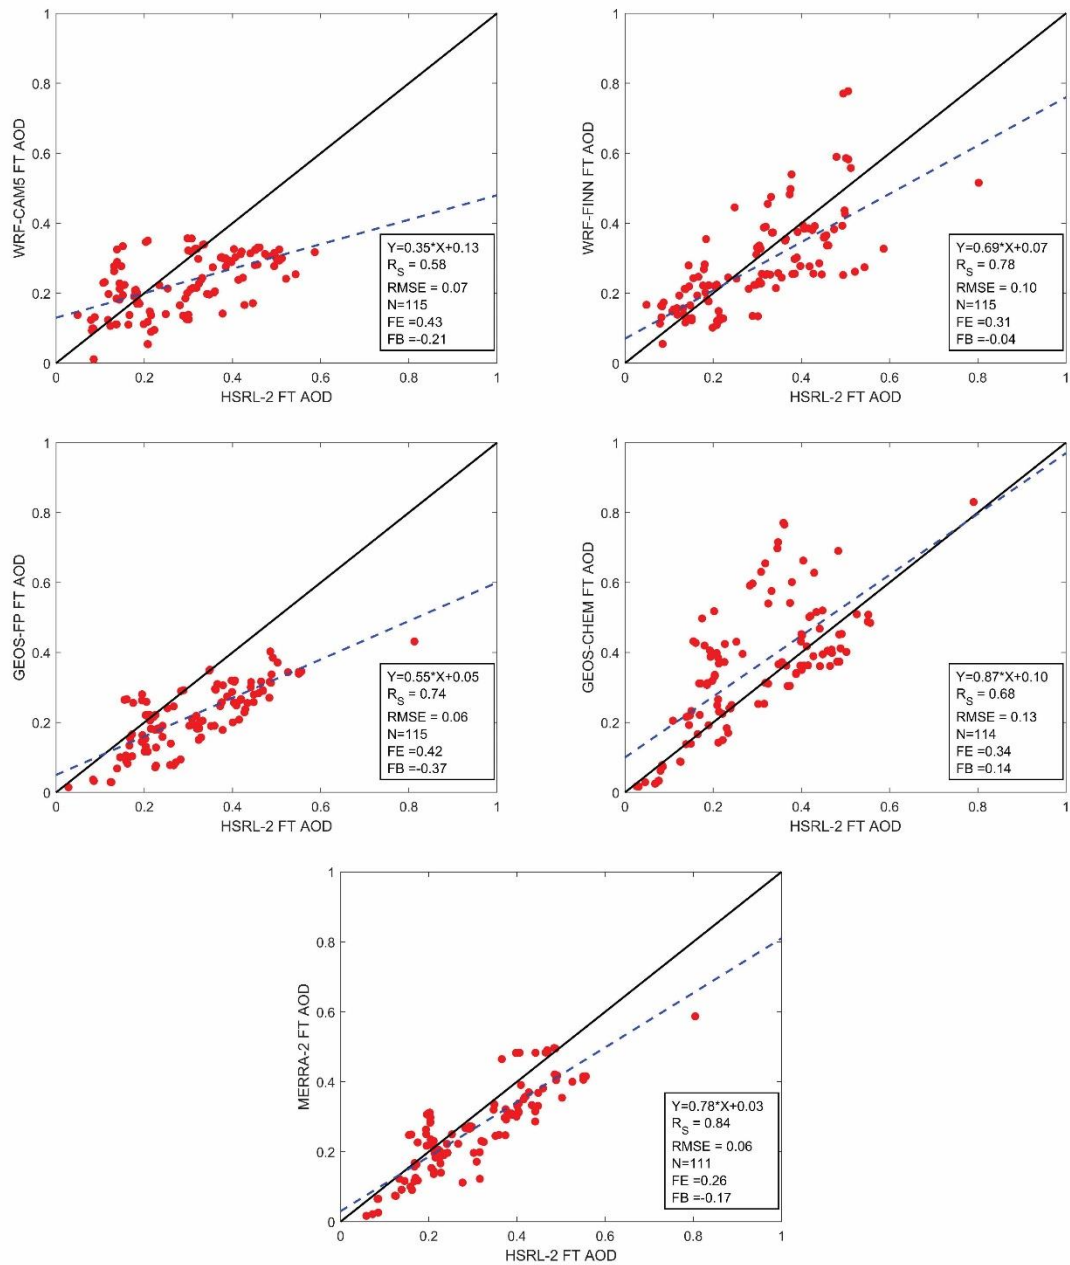

Figure S 19. Scatter plots comparing FT AOD among models and the HSRL-2 during August 2017.
